# Supplementary material
Source: ML conference proceedings conference paper supplement (https://openreview.net/forum?id=LKgqKbzZKA)
Supplement: supplementary_material [file attachment]

## A PROOFS

Proof of Lemma [5](#)

*Proof.* We construct  $\hat{p}$  inductively as follows. For a product node, we have  $\hat{p}(t) = \hat{p}_0(t_0)\hat{p}_1(t_1)$ , and so

$$\begin{aligned} p(x) &= \sum_{t \in \{0,1\}^n} \hat{p}(t)(-1)^{\langle t, x \rangle} \\ &= \sum_{t \in \{0,1\}^n} \hat{p}_0(t_0)\hat{p}_1(t_1)(-1)^{\langle t, x \rangle} \\ &= \left( \sum_{t_0 \in \{0,1\}^n} \hat{p}_0(t_0)(-1)^{\langle t_0, x_0 \rangle} \right) \cdot \left( \sum_{t_1 \in \{0,1\}^n} \hat{p}_1(t_1)(-1)^{\langle t_1, x_1 \rangle} \right) \\ &= p_0(x_0)p_1(x_1) \end{aligned}$$

where the first equality follows from definition, the second from the hypothesis, the third from algebra, and the final from definition. For a sum node, we have  $\hat{p}(t) = \sum_i w_i \hat{p}_i(t)$ , and so

$$\begin{aligned} p(x) &= \sum_{t \in \{0,1\}^n} \hat{p}(t)(-1)^{\langle t, x \rangle} \\ &= \sum_{t \in \{0,1\}^n} \left( \sum_i w_i \hat{p}_i(t) \right) (-1)^{\langle t, x \rangle} \\ &= \sum_i w_i \sum_{t \in \{0,1\}^n} \hat{p}_i(t)(-1)^{\langle t, x \rangle} \\ &= \sum_i w_i p_i(x) \end{aligned}$$

where the equalities follow, respectively, from definition, assumption, commutativity of addition, and definition.

For leaf nodes, it suffices to consider only univariate leaves that are children of sums; for any leaf a child of a product node, add a sum node with weight 1 between them. Then, for a univariate child of a sum node with scope the singleton  $\{i\}$ , we have either  $p(x_i) = c$ , and so

$$\begin{aligned} \hat{p}(t_i) &= \sum_{S \subseteq [n]} p(x_S) \prod_{i \in S} (1 - 2t_i) \\ &= 2^{-n}(c + c(1 - 2x_i)) = 2^{-n+1}c(1 - x_i) \end{aligned}$$

or  $p(x_i) = x_i$ , in which case

$$\hat{p}(t_i) = \sum_{S \subseteq [n]} p(x_S) \prod_{i \in S} (1 - 2t_i) = 2^{-n}(1 - 2x_i). \quad (12)$$

□
